# Supplementary material for: Isolation and Characterization of Anti-Inflammatory Compounds from Ficus microcarpa L.f. Stem Bark
Source: MDPI journal article supplement (doi:10.3390/plants12183248), 2023-09-13

# Isolation and Characterization of Anti-Inflammatory Compounds from *Ficus microcarpa* L.f. Stem Bark

Mohan Kalaskar <sup>1</sup>, Vivek Redasani <sup>2</sup>, Muniappan Ayyanar <sup>3</sup>, Mahavir Ghante <sup>4</sup>, Sandip Firke <sup>1</sup>, Kapil Agrawal <sup>1</sup>, Vilas Ghawate <sup>5</sup>, Sanjay Surana <sup>1</sup>, Saud Alarifi <sup>6</sup>, Rupesh Chikhale <sup>7</sup> and Shailendra Gurav <sup>8,\*</sup>

- <sup>1</sup> Department of Pharmacognosy, R. C. Patel Institute of Pharmaceutical Education and Research, Shirpur 425 405, MS, India; kalaskar.mohan@gmail.com (M.K.); sandipdfirke@gmail.com (S.F.); contactkap@gmail.com (K.A.); sjsurana@yahoo.com (S.S.)
- <sup>2</sup> Department of Pharmaceutical Chemistry, YSPM's Yashoda Technical Campus, Faculty of Pharmacy, Satara 415 001, MS, India; vivek.redasani@gmail.com
- <sup>3</sup> Department of Botany, A. V. V. M. Sri Pushpam College, Bharathidasan University, Poondi, Thanjavur 613 503, TN, India; asmayyanar@yahoo.com
- <sup>4</sup> Department of Pharmaceutical Chemistry, Guru Ghasidas Vishwavidyalaya, Bilaspur 495 001, CG, India; mhghante@gmail.com
- <sup>5</sup> Department of Pharmacognosy, MES College of Pharmacy, Sonai 414 105, MS, India; ghawatevilas@gmail.com
- <sup>6</sup> Department of Zoology, College of Science, King Saud University, P.O. Box 2455, Riyadh 11451, Saudi Arabia; alarifi\_saud@yahoo.com
- <sup>7</sup> UCL School of Pharmacy, 29–39 Brunswick Square, London WC1N 1AX, UK; r.chikhale@ucl.ac.uk
- <sup>8</sup> Department of Pharmacognosy, Goa College of Pharmacy, Goa University, Panaji 403 001, GA, India
- \* Correspondence: shailendra.gurav@nic.in; Tel.: +91-9970835019

**Citation:** Kalaskar, M.; Redasani, V.; Ayyanar, M.; Ghante, M.; Firke, S.; Agrawal, K.; Ghawate, V.; Surana, S.; Alarifi, S.; Chikhale, R.; et al. Isolation and Characterization of Anti-Inflammatory Compounds from *Ficus microcarpa* L.f. Stem Bark. *Plants* **2023**, *12*, 3248. <https://doi.org/10.3390/plants12183248>

Academic Editors: Farid Chemat, Nouredine Allouche and Nathan Téné

Received: 18 August 2023  
Revised: 9 September 2023  
Accepted: 11 September 2023  
Published: 13 September 2023

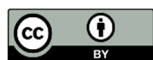

**Copyright:** © 2023 by the authors. Submitted for possible open access publication under the terms and conditions of the Creative Commons Attribution (CC BY) license (<https://creativecommons.org/licenses/by/4.0/>).

**Abstract:** The anti-inflammatory effect of the ethyl acetate extract of *F. microcarpa* bark (EAFMB) was investigated in acute and chronic (21 days) inflammation induced in Wistar albino rats. EAFMB (200 mg/kg b.w.) exhibited comparable anti-inflammatory effects to the reference drug, with a reduction of 59.48% at 4 h in acute inflammation and 83.96% on day 21 in chronic inflammation. Bioassay-guided fractionation using DPPH radical scavenging activity led to isolating and identifying three compounds from EAFMB: oleanolic acid, catechin, and p-hydroxycinnamic acid. All these compounds demonstrated the concentration-dependent inhibition of COX enzymes and the protection of egg albumin from heat-induced denaturation. Catechin exhibited the highest COX inhibition (COX-1 and COX-2 IC<sub>50</sub> = 9.02 and 50.38 µM, respectively) and anti-denaturation effect (IC<sub>50</sub> = 27.13 µg/mL) compared to oleanolic acid and p-hydroxycinnamic acid. These isolated compounds are likely responsible for the anti-inflammatory activities of *F. microcarpa* bark.

**Keywords:** anti-inflammatory activity; *Ficus microcarpa*; catechin; anti-denaturation; COX inhibition

Figure S1a:  $^1\text{H}$  NMR of FMC-1

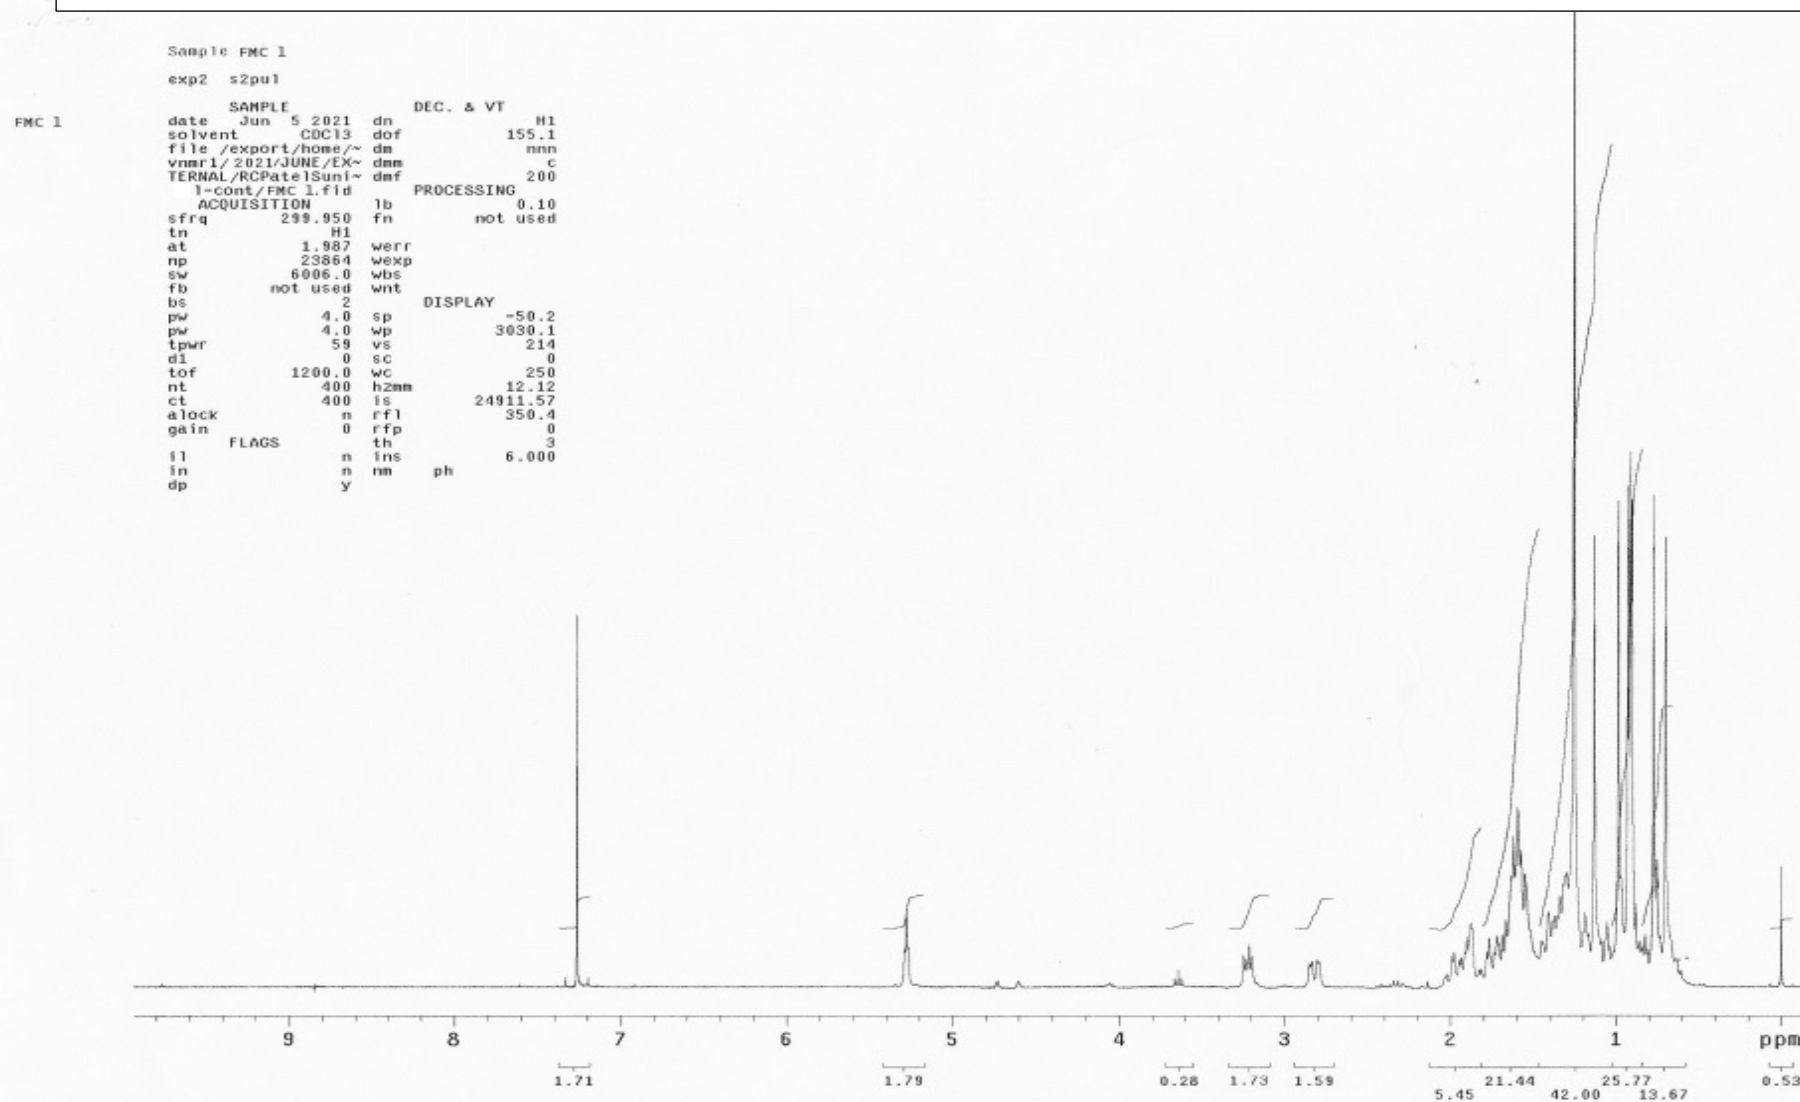

# 1H NMR of FMC-1 (Resolution)

Sample FMC 1

Data Collected on: quanta-mercuryhifreq  
Archive directory: /export/home/vnmr1/vnmrsys/data  
Sample directory:  
File: FMC 1

Pulse Sequence: s2pu1

| INDEX | FREQUENCY | PPM   | HEIGHT | INDEX | FREQUENCY | PPM    | HEIGHT |
|-------|-----------|-------|--------|-------|-----------|--------|--------|
| 1     | 2198.731  | 7.330 | 1.7    | 51    | 355.946   | 1.187  | 12.7   |
| 2     | 2178.570  | 7.263 | 63.0   | 52    | 350.081   | 1.167  | 9.1    |
| 3     | 2175.637  | 7.253 | 2.0    | 53    | 339.450   | 1.132  | 76.6   |
| 4     | 2158.774  | 7.197 | 1.6    | 54    | 326.254   | 1.088  | 7.9    |
| 5     | 1586.547  | 5.289 | 6.5    | 55    | 315.623   | 1.052  | 11.1   |
| 6     | 1583.248  | 5.278 | 13.4   | 56    | 311.224   | 1.038  | 7.0    |
| 7     | 1579.949  | 5.267 | 6.8    | 57    | 295.461   | 0.985  | 82.6   |
| 8     | 1092.767  | 3.643 | 2.9    | 58    | 290.695   | 0.969  | 19.0   |
| 9     | 973.629   | 3.246 | 5.4    | 59    | 288.863   | 0.963  | 16.6   |
| 10    | 968.864   | 3.230 | 4.7    | 60    | 278.232   | 0.928  | 85.1   |
| 11    | 963.365   | 3.212 | 7.3    | 61    | 273.466   | 0.912  | 90.9   |
| 12    | 958.233   | 3.195 | 5.3    | 62    | 271.267   | 0.904  | 83.0   |
| 13    | 854.492   | 2.849 | 3.9    | 63    | 263.935   | 0.880  | 14.2   |
| 14    | 850.459   | 2.835 | 4.4    | 64    | 256.970   | 0.857  | 7.9    |
| 15    | 840.928   | 2.804 | 4.7    | 65    | 251.838   | 0.840  | 6.8    |
| 16    | 836.896   | 2.790 | 4.3    | 66    | 246.706   | 0.822  | 9.0    |
| 17    | 609.251   | 2.031 | 1.8    | 67    | 241.941   | 0.807  | 6.4    |
| 18    | 605.952   | 2.020 | 2.2    | 68    | 231.677   | 0.772  | 83.6   |
| 19    | 596.421   | 1.988 | 5.3    | 69    | 224.345   | 0.748  | 87.3   |
| 20    | 592.389   | 1.975 | 5.9    | 70    | 215.547   | 0.719  | 8.4    |
| 21    | 583.591   | 1.946 | 4.6    | 71    | 204.550   | 0.682  | 2.8    |
| 22    | 579.192   | 1.931 | 5.0    | 72    | -0.000    | -0.000 | 20.5   |
| 23    | 572.960   | 1.910 | 6.0    |       |           |        |        |
| 24    | 569.661   | 1.899 | 8.5    |       |           |        |        |
| 25    | 562.329   | 1.875 | 11.0   |       |           |        |        |
| 26    | 559.763   | 1.866 | 10.0   |       |           |        |        |
| 27    | 546.933   | 1.823 | 3.0    |       |           |        |        |
| 28    | 542.901   | 1.810 | 3.1    |       |           |        |        |
| 29    | 533.370   | 1.778 | 6.0    |       |           |        |        |
| 30    | 528.971   | 1.764 | 8.3    |       |           |        |        |
| 31    | 519.806   | 1.733 | 5.9    |       |           |        |        |
| 32    | 515.407   | 1.718 | 8.7    |       |           |        |        |
| 33    | 512.108   | 1.707 | 7.5    |       |           |        |        |
| 34    | 505.143   | 1.684 | 9.0    |       |           |        |        |
| 35    | 498.912   | 1.663 | 11.5   |       |           |        |        |
| 36    | 489.380   | 1.632 | 19.0   |       |           |        |        |
| 37    | 485.348   | 1.618 | 25.6   |       |           |        |        |
| 38    | 477.650   | 1.592 | 30.5   |       |           |        |        |
| 39    | 471.785   | 1.573 | 23.3   |       |           |        |        |
| 40    | 464.453   | 1.548 | 19.3   |       |           |        |        |
| 41    | 434.394   | 1.448 | 7.9    |       |           |        |        |
| 42    | 431.461   | 1.438 | 7.6    |       |           |        |        |
| 43    | 422.663   | 1.409 | 12.8   |       |           |        |        |
| 44    | 411.666   | 1.372 | 12.1   |       |           |        |        |
| 45    | 405.801   | 1.353 | 12.2   |       |           |        |        |
| 46    | 401.768   | 1.339 | 15.5   |       |           |        |        |
| 47    | 395.903   | 1.320 | 17.6   |       |           |        |        |
| 48    | 390.038   | 1.300 | 19.5   |       |           |        |        |
| 49    | 375.741   | 1.253 | 214.3  |       |           |        |        |
| 50    | 359.245   | 1.198 | 9.5    |       |           |        |        |

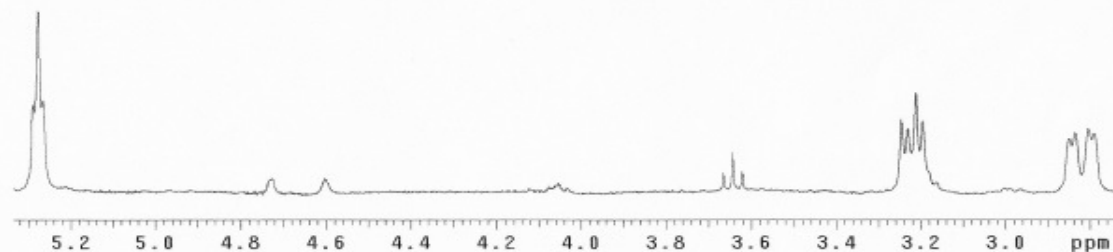

Figure S1b: <sup>13</sup>C NMR of FMC-1

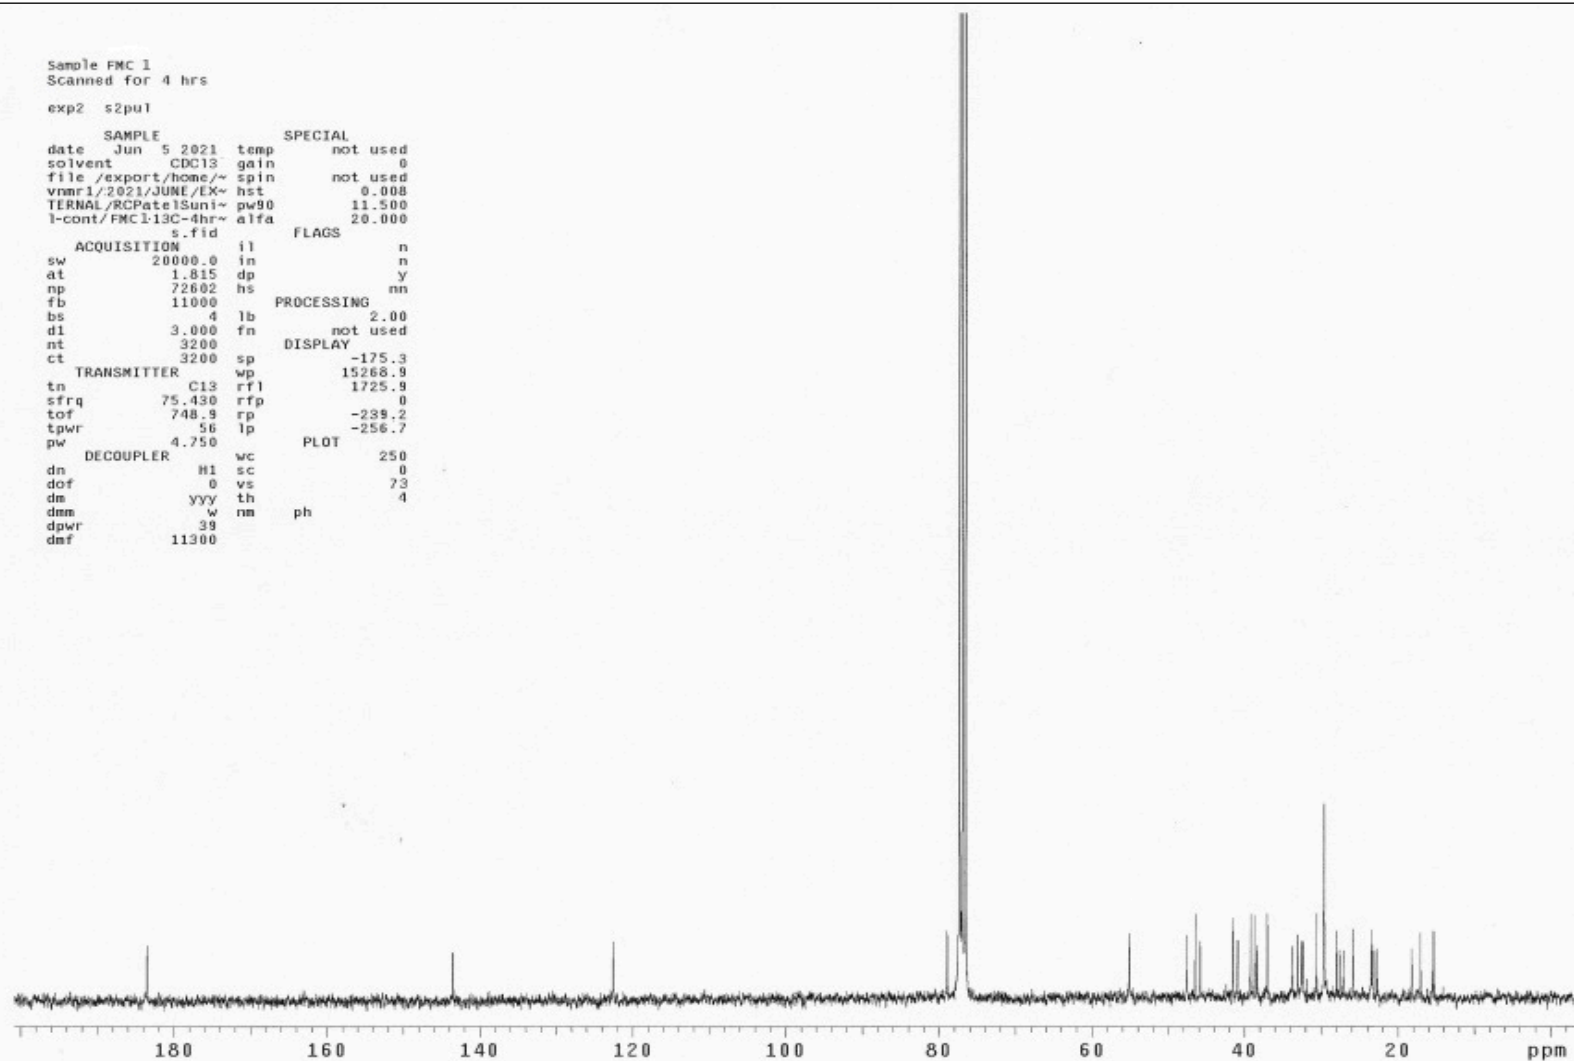



**<sup>13</sup>C NMR of FMC-1 (Resolution)**

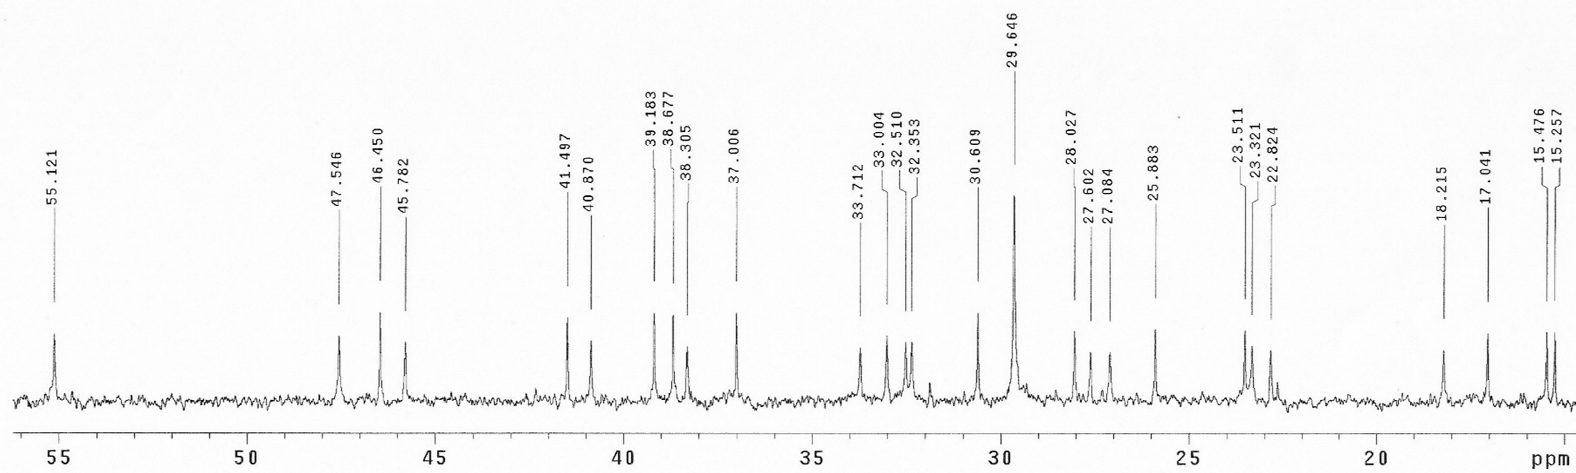

**<sup>13</sup>C NMR of FMC-1 (Resolution**

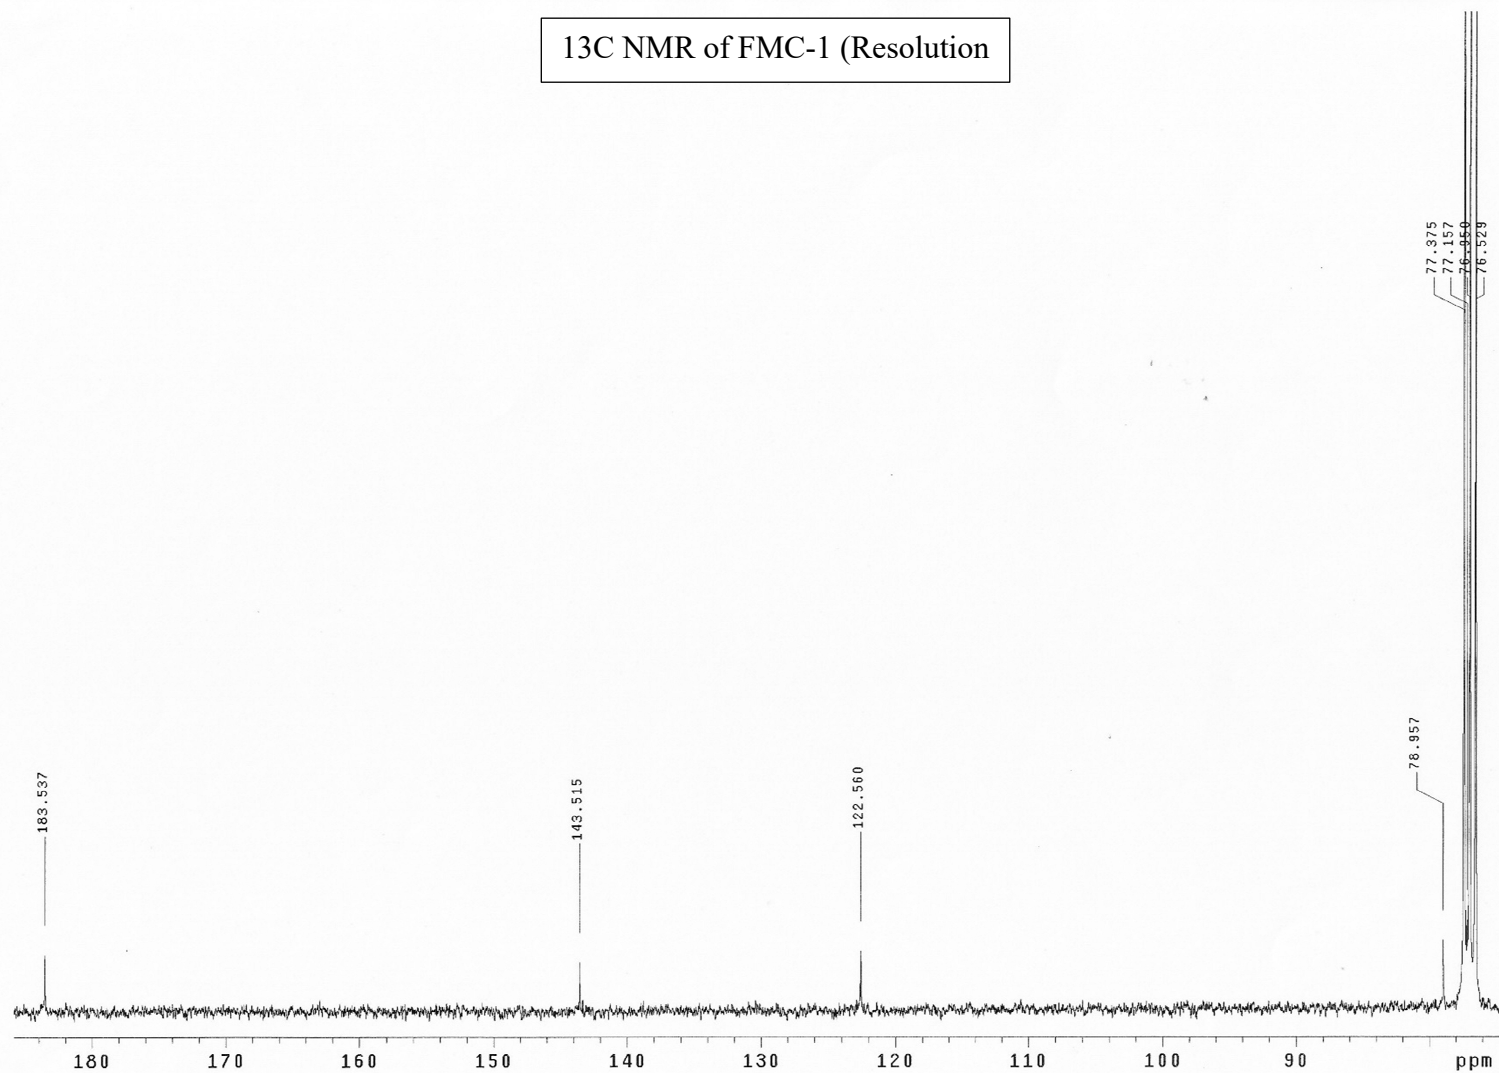

Figure S1c: EI-MS of FMC-1

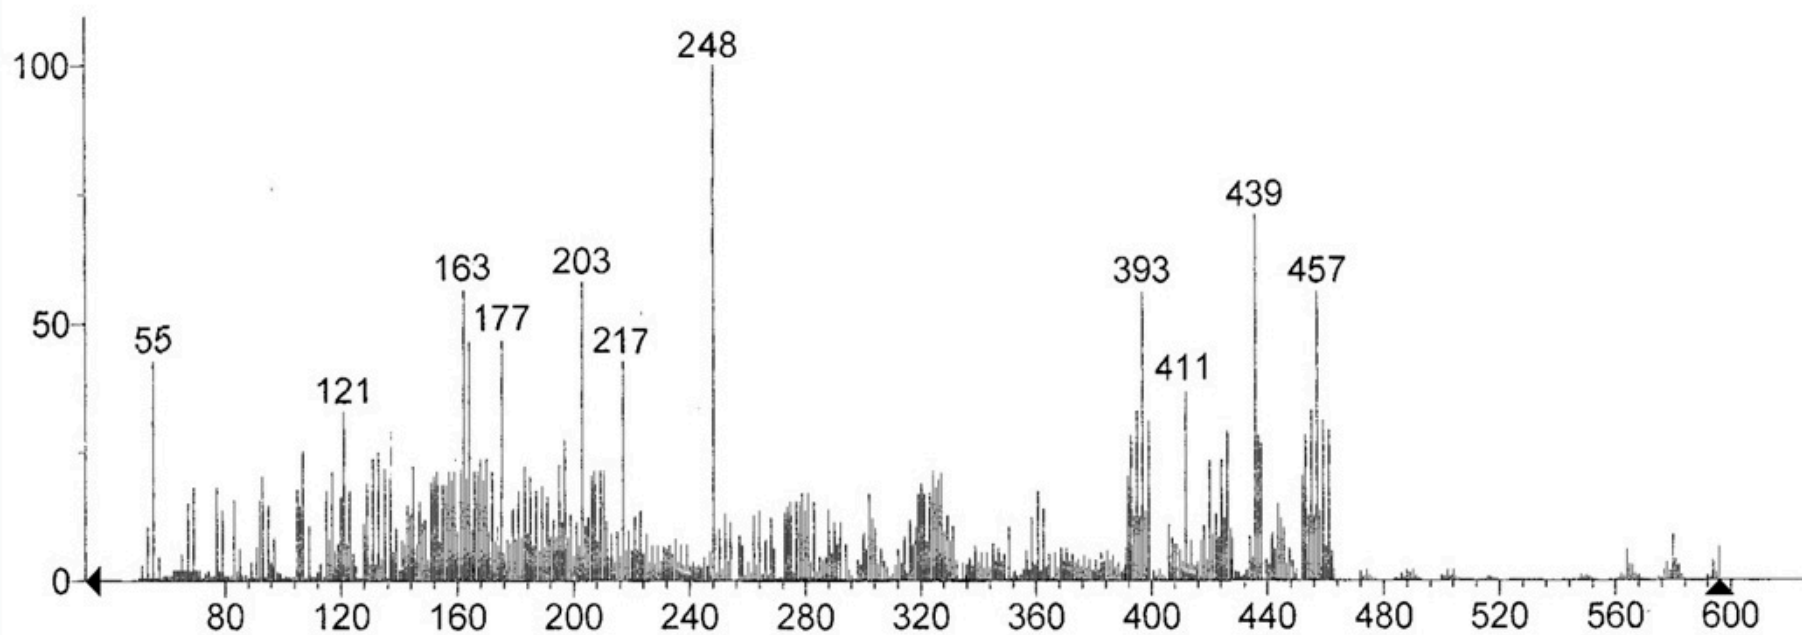

Figure S1d: FT-IR of FMC-1

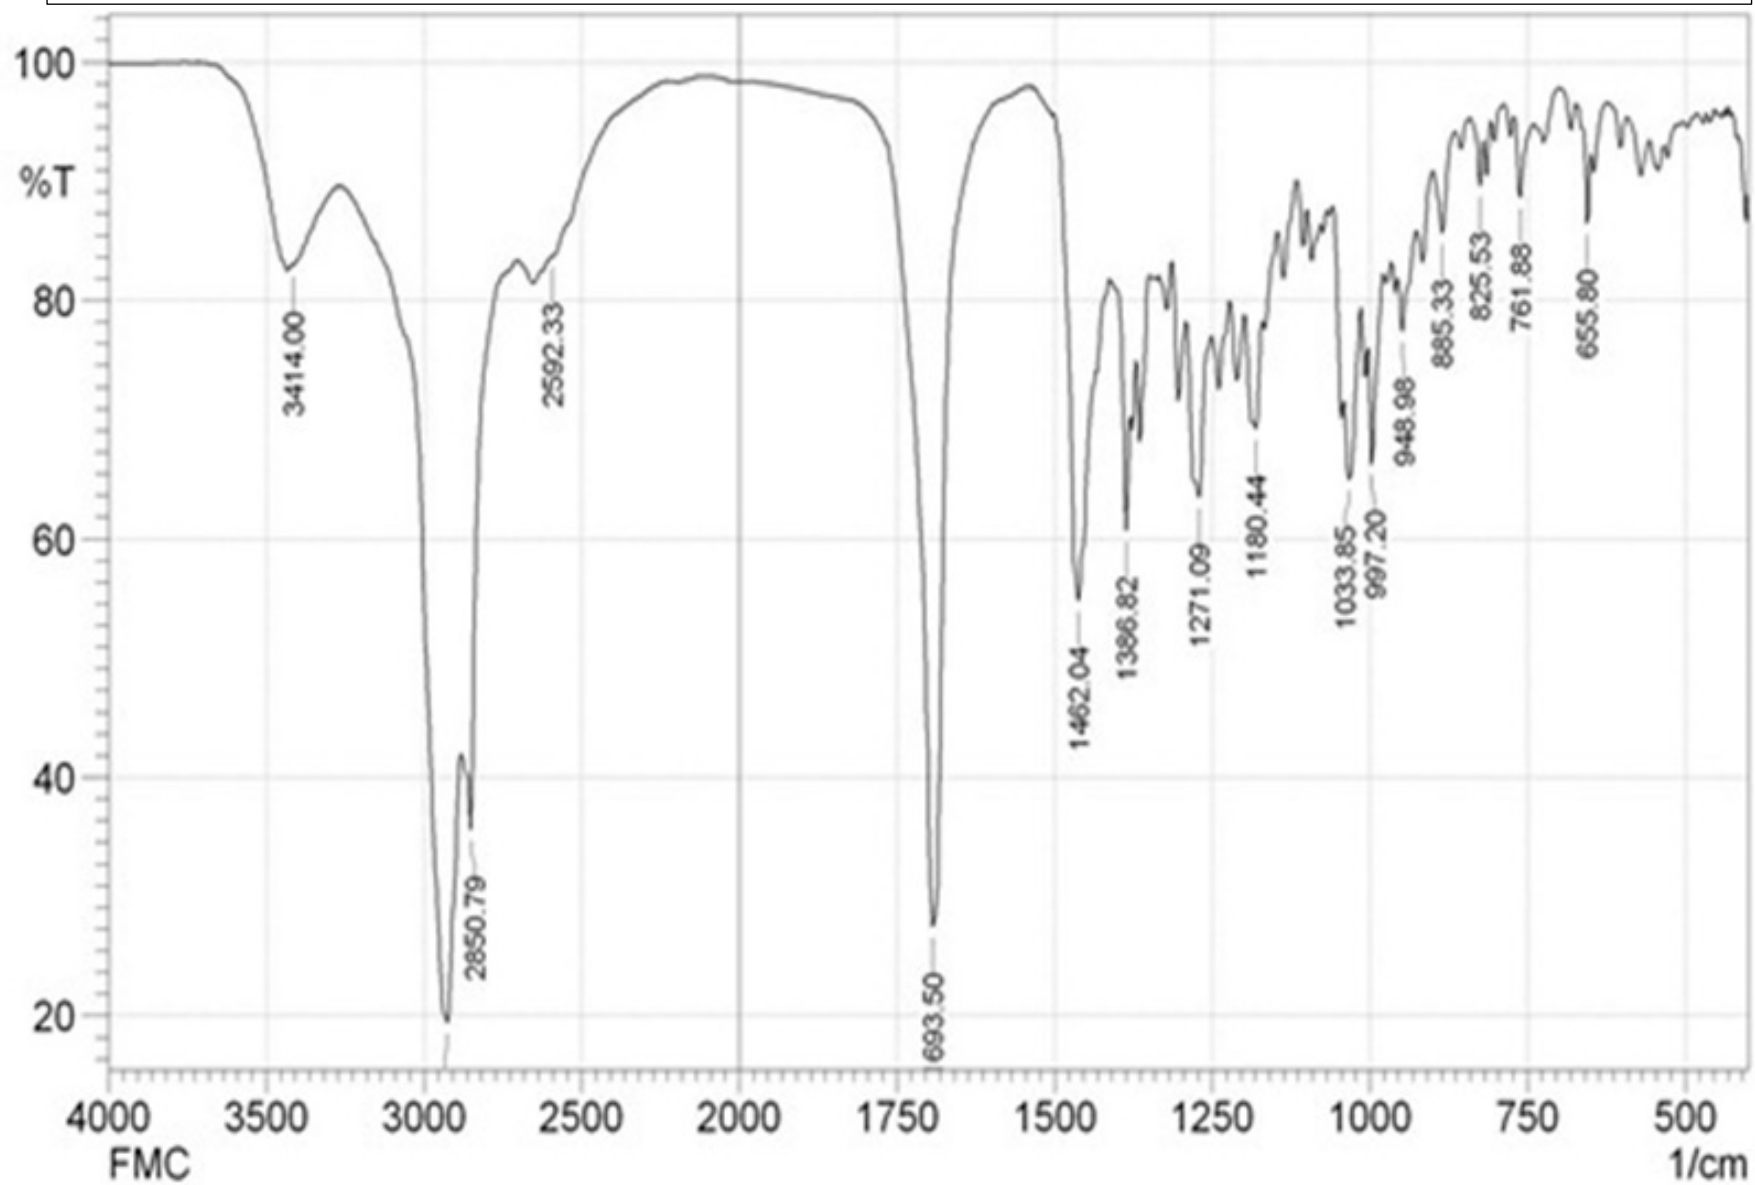



Figure S2a:  $^1\text{H}$  NMR of FMC-2

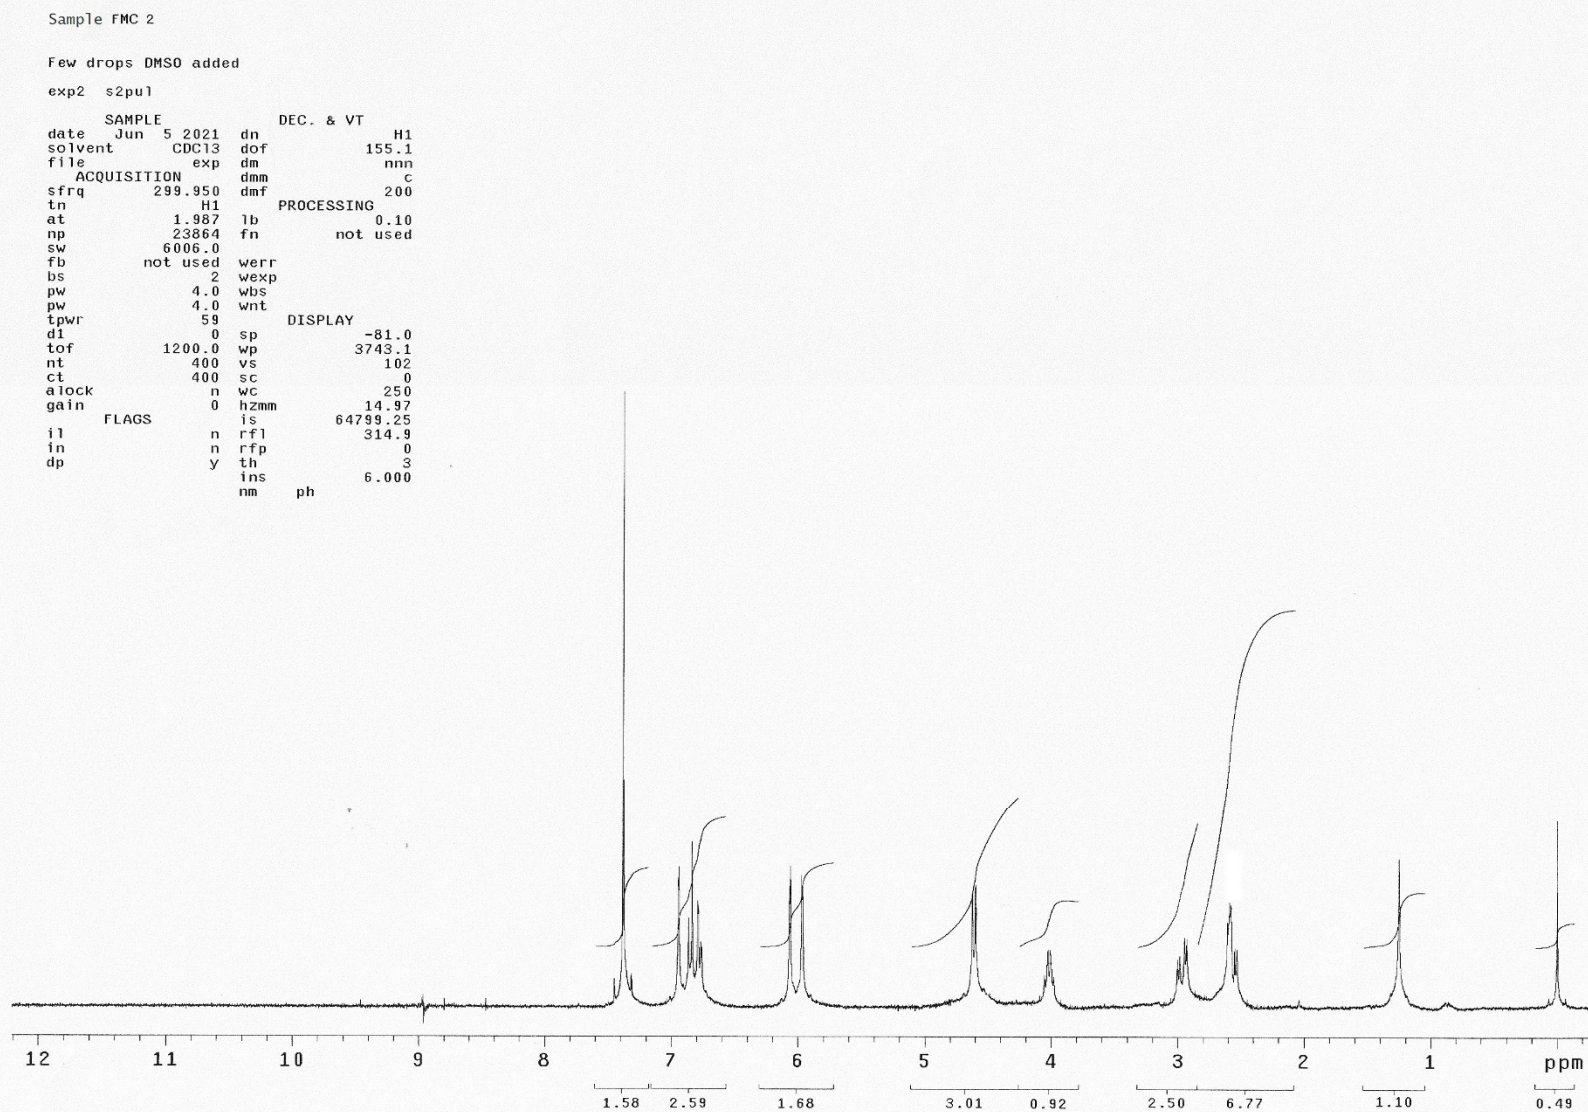



Figure S2b:  $^{13}\text{C}$  NMR of FMC-2 (resolution)

Sample FMC 2  
Few drops DMSO added  
Data Collected on: quanta-mercuryhifreq  
Archive directory: /export/home/vnmr1/vnmrsys/data  
Sample directory:  
File: H1

Pulse Sequence: s2pu1

| INDEX | FREQUENCY | PPM   | HEIGHT |
|-------|-----------|-------|--------|
| 1     | 2234.657  | 7.450 | 4.6    |
| 2     | 2214.495  | 7.383 | 102.0  |
| 3     | 2194.333  | 7.316 | 5.5    |
| 4     | 2083.993  | 6.948 | 21.3   |
| 5     | 2082.527  | 6.943 | 23.2   |
| 6     | 2059.432  | 6.866 | 14.7   |
| 7     | 2051.368  | 6.839 | 27.4   |
| 8     | 2038.171  | 6.795 | 17.6   |
| 9     | 2036.338  | 6.789 | 16.9   |
| 10    | 2030.106  | 6.768 | 10.8   |
| 11    | 1820.057  | 6.068 | 20.1   |
| 12    | 1817.858  | 6.061 | 23.4   |
| 13    | 1791.098  | 5.971 | 21.9   |
| 14    | 1788.898  | 5.964 | 20.4   |
| 15    | 1387.129  | 4.625 | 18.6   |
| 16    | 1379.431  | 4.599 | 20.3   |
| 17    | 1215.204  | 4.051 | 5.3    |
| 18    | 1206.773  | 4.023 | 9.5    |
| 19    | 1201.641  | 4.006 | 9.4    |
| 20    | 1193.576  | 3.979 | 5.1    |
| 21    | 900.681   | 3.003 | 11.0   |
| 22    | 895.182   | 2.984 | 11.6   |
| 23    | 884.552   | 2.949 | 14.6   |
| 24    | 879.053   | 2.931 | 14.4   |
| 25    | 782.276   | 2.608 | 22.5   |
| 26    | 778.977   | 2.597 | 23.6   |
| 27    | 777.144   | 2.591 | 25.8   |
| 28    | 774.945   | 2.584 | 25.4   |
| 29    | 766.514   | 2.555 | 17.8   |
| 30    | 758.082   | 2.527 | 15.6   |
| 31    | 375.742   | 1.253 | 24.7   |
| 32    | 0.000     | 0.000 | 31.0   |

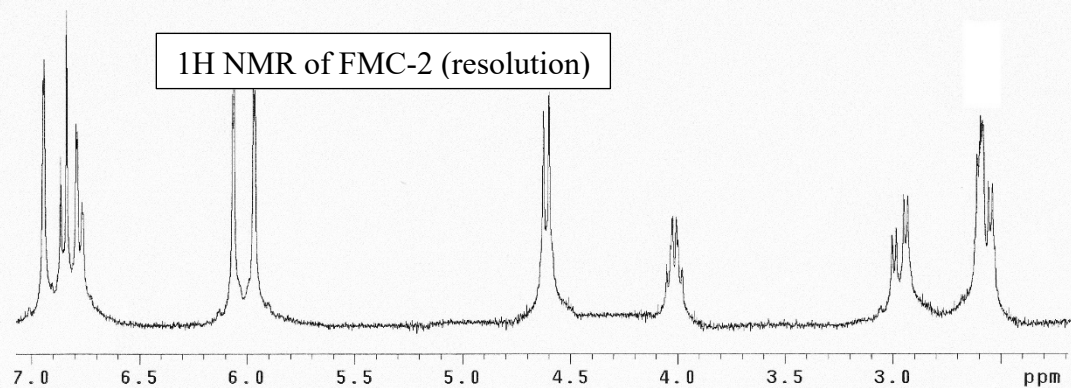

Figure S2c: EI-MS of FMC-2

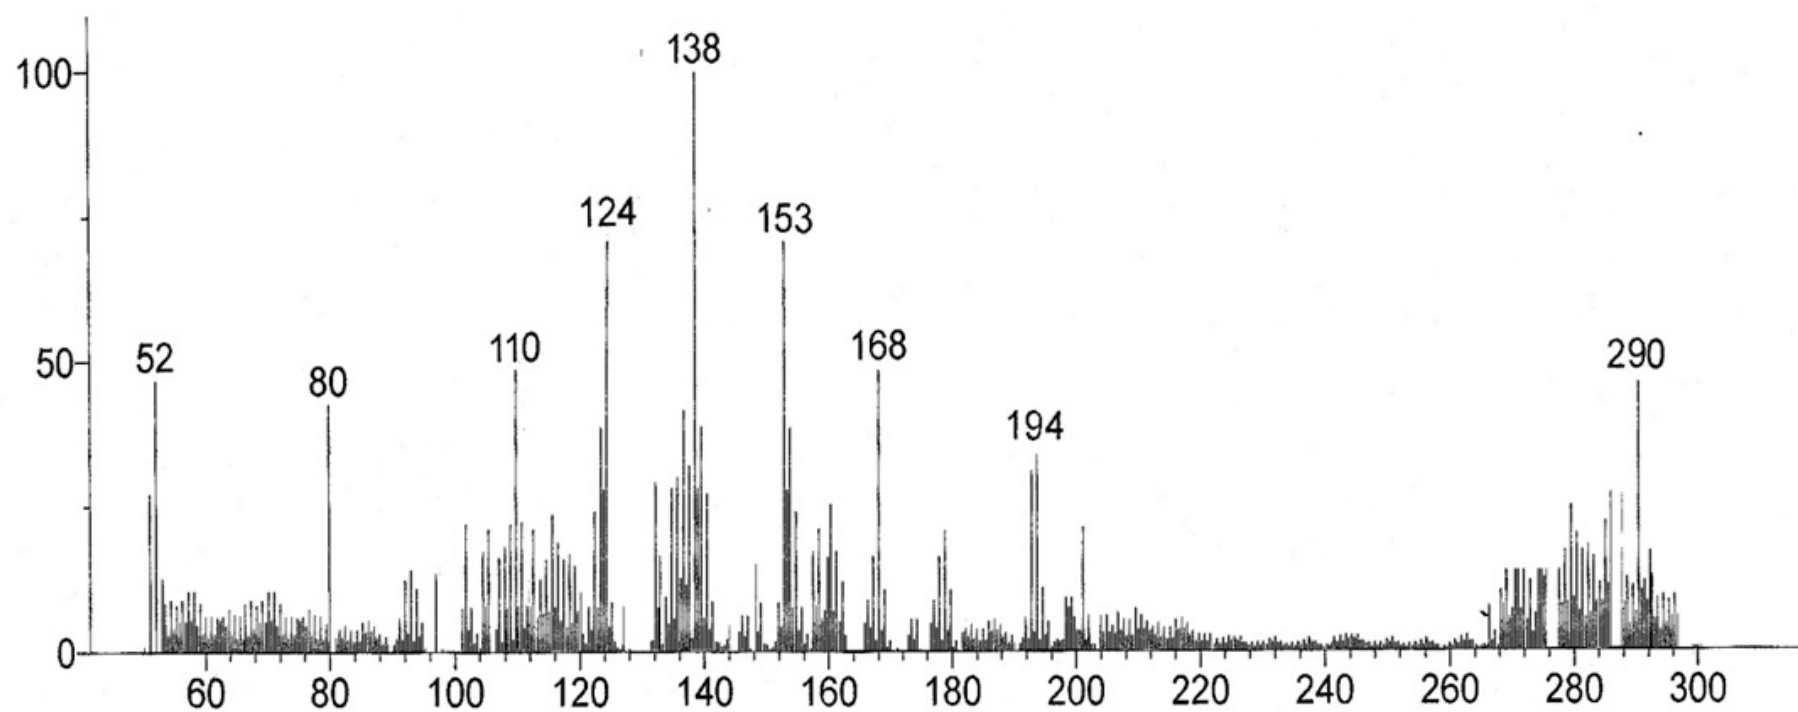

Figure S2d: FT-IR of FMC-2

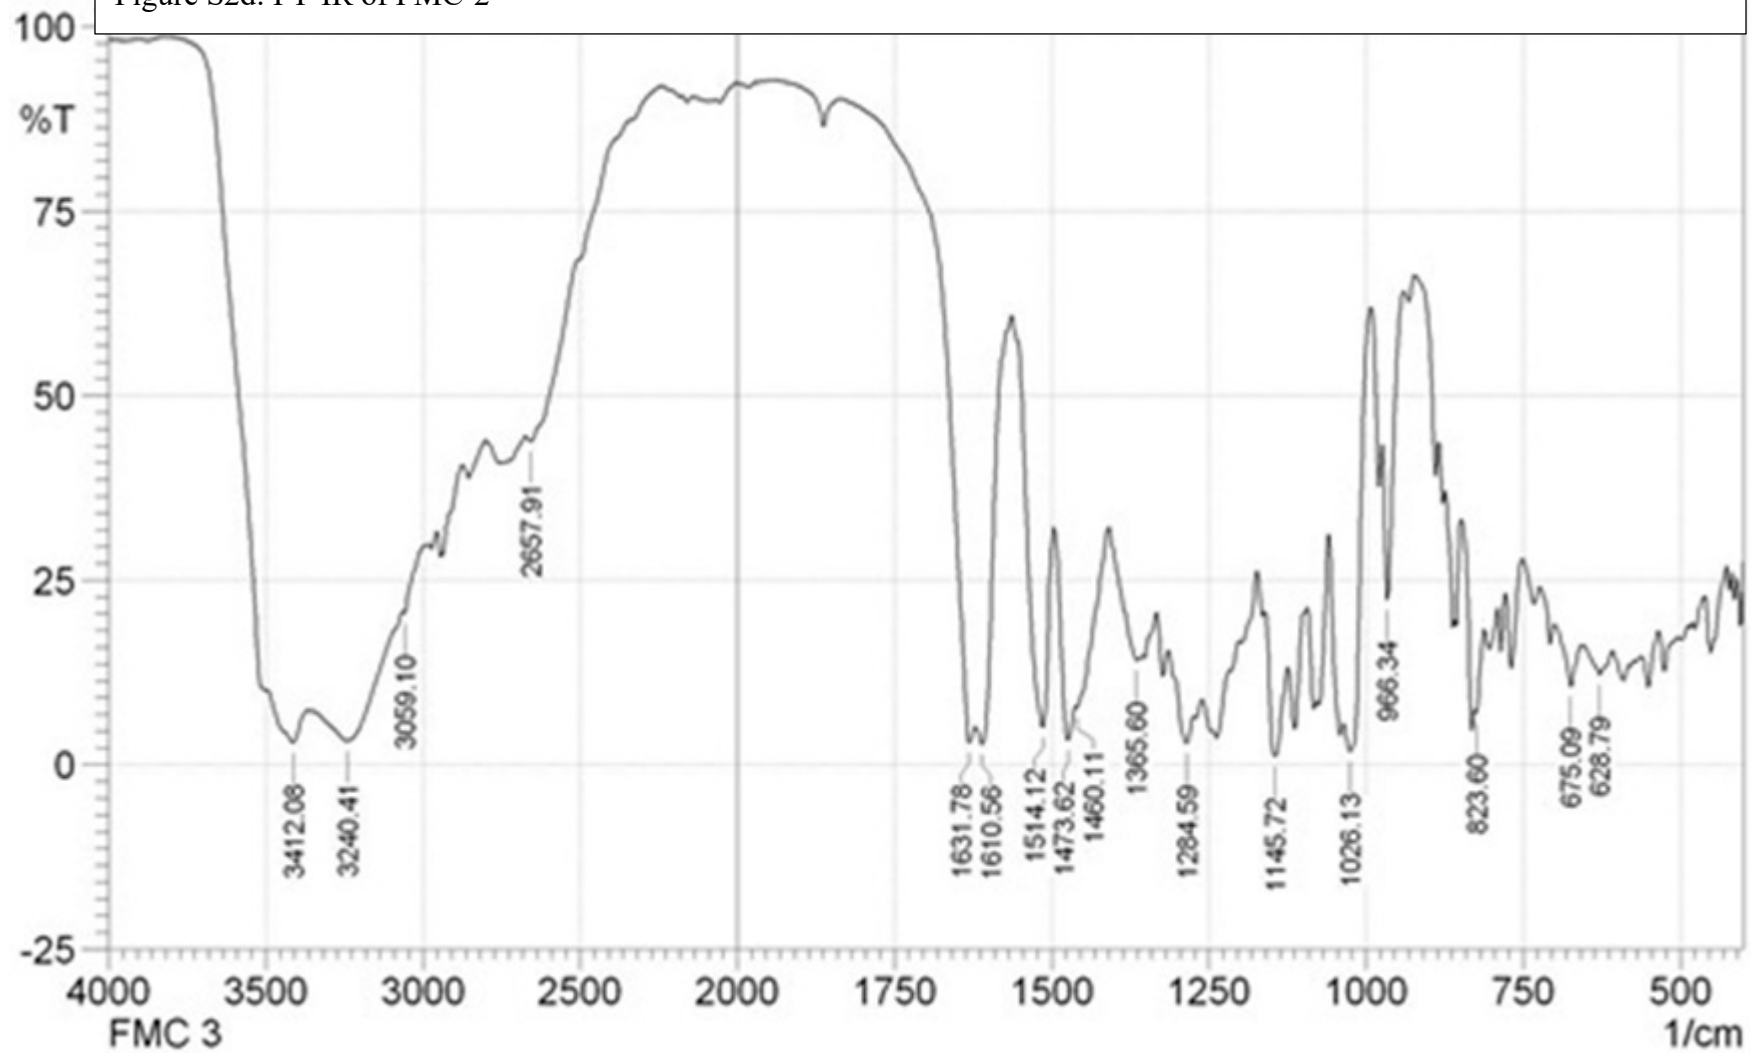



Figure S3a:  $^1\text{H}$  NMR of FMC-3

Sample FMC 3  
few drops DMSO added  
expl s2pu1

| SAMPLE              |                | DEC. & VT  |          |
|---------------------|----------------|------------|----------|
| date                | Jun 5 2021     | dn         | H1       |
| solvent             | CDC13          | dof        | 155.1    |
| file                | /export/home/~ | dn         | nm       |
| vnmr1/2021/JUNE/EX~ |                | dmm        | c        |
| TERNAL/RCPate1Suni~ |                | dmf        | 200      |
| 1-cont/FMC 3.fid    |                | PROCESSING |          |
| ACQUISITION         |                | lb         | 0.10     |
| sfrq                | 299.950        | fn         | not used |
| tn                  | H1             |            |          |
| at                  | 1.987          | werr       |          |
| np                  | 23864          | wexp       |          |
| sw                  | 6006.0         | wbs        |          |
| fb                  | not used       | wnt        |          |
| bs                  | 2              | DISPLAY    |          |
| pw                  | 4.0            | sp         | -30.4    |
| pw                  | 4.0            | wp         | 3637.9   |
| tpwr                | 59             | vs         | 77       |
| d1                  | 0              | sc         | 0        |
| tof                 | 1200.0         | wc         | 250      |
| nt                  | 1600           | hzmm       | 0.73     |
| ct                  | 194            | is         | 59982.30 |
| alock               | n              | rfl        | 329.6    |
| gain                | 0              | rffp       | 0        |
| FLAGS               |                | th         | 3        |
| il                  | n              | ins        | 6.000    |
| in                  | n              | nm         | ph       |
| dp                  | y              |            |          |

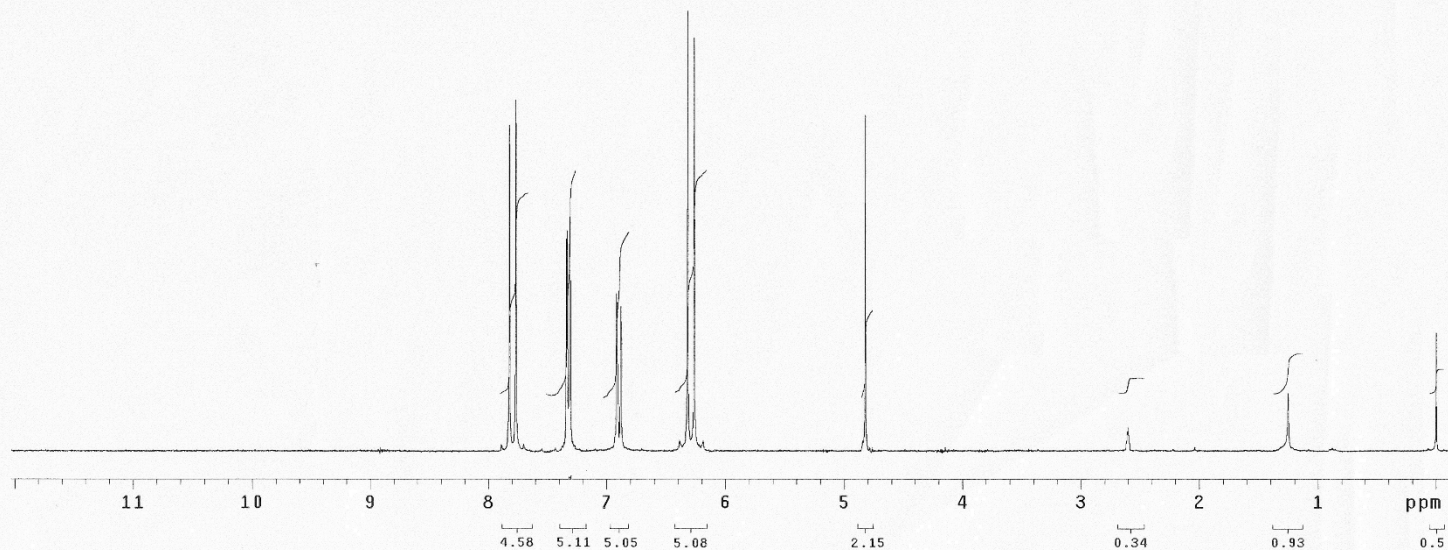

1H NMR of FMC-3 (Resolution)

FMC3  
few drops DMSO added  
Data Collected on: quanta-mercuryhifreq  
Archive directory: /export/home/vnmr1/vnmrsys/data  
Sample directory:  
File: FMC3

Pulse Sequence: s2pu1

| INDEX | FREQUENCY | PPM    | HEIGHT |
|-------|-----------|--------|--------|
| 1     | 2392.285  | 7.596  | 38.3   |
| 2     | 2235.756  | 7.544  | 40.9   |
| 3     | 2146.311  | 7.341  | 27.8   |
| 4     | 2144.845  | 7.314  | 25.6   |
| 5     | 2076.295  | 6.919  | 27.1   |
| 6     | 2068.230  | 6.858  | 32.3   |
| 7     | 2049.535  | 6.446  | 51.7   |
| 8     | 2042.203  | 6.402  | 49.0   |
| 9     | 1962.289  | 4.782  | 95.0   |
| 10    | 780.444   | 2.602  | 4.9    |
| 11    | 375.375   | 1.251  | 10.8   |
| 12    | -0.733    | -0.002 | 20.6   |

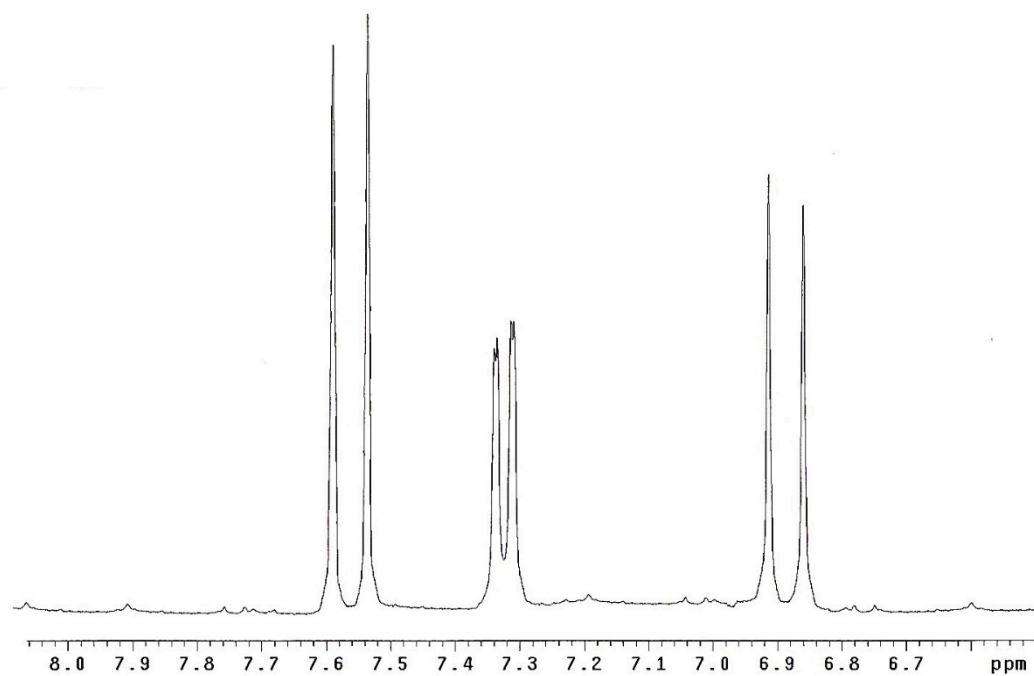

Figure S3b:  $^{13}\text{C}$  NMR of FMC-3

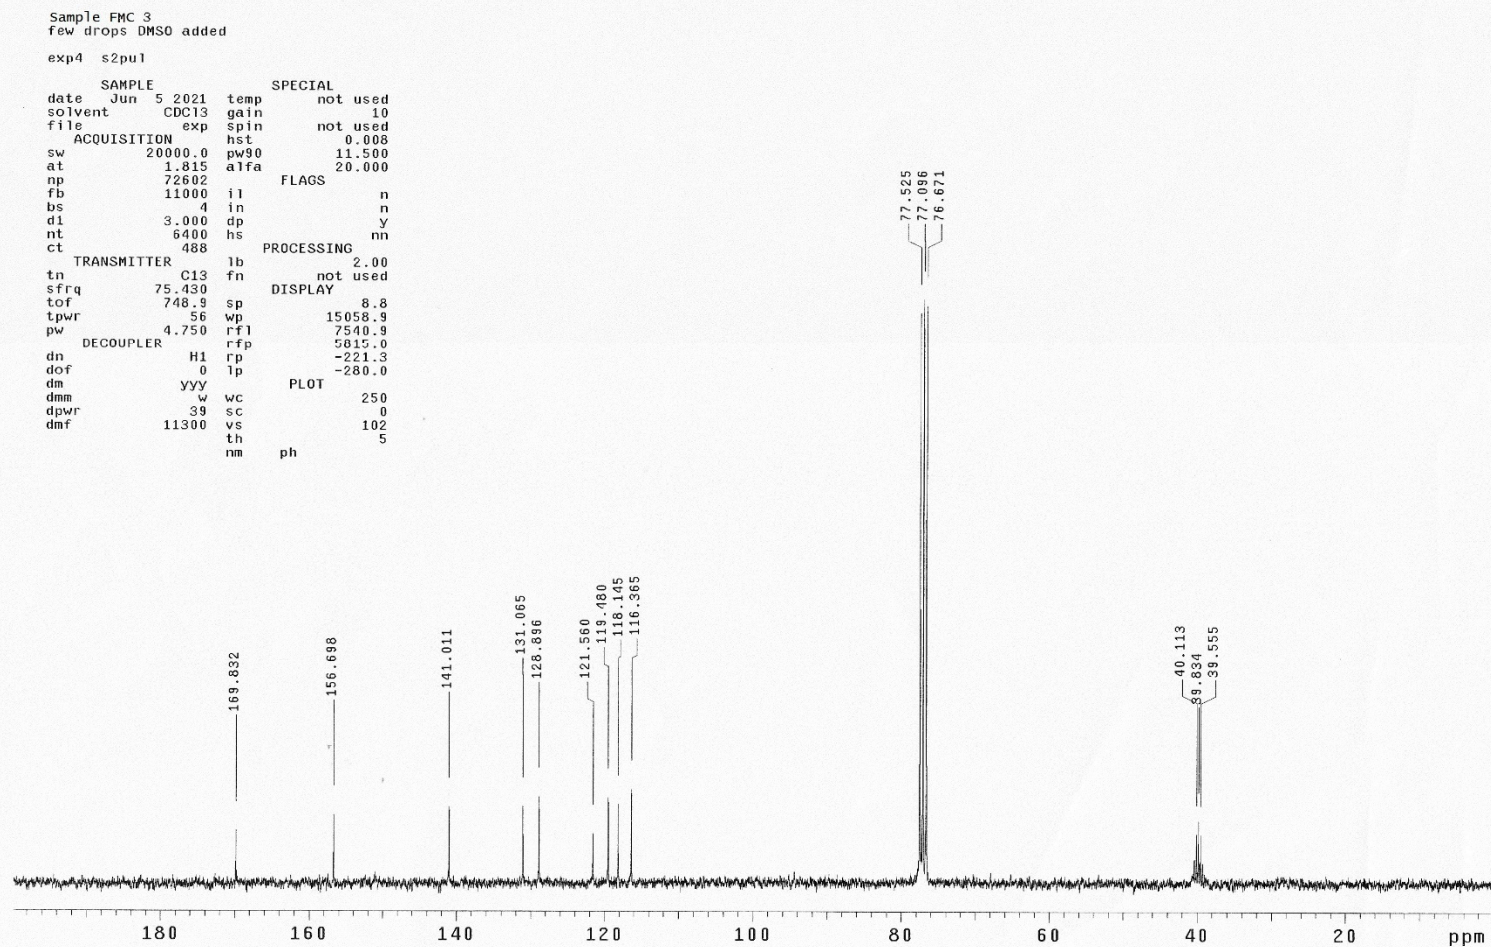

Figure S3d:FT-IR of FMC-3

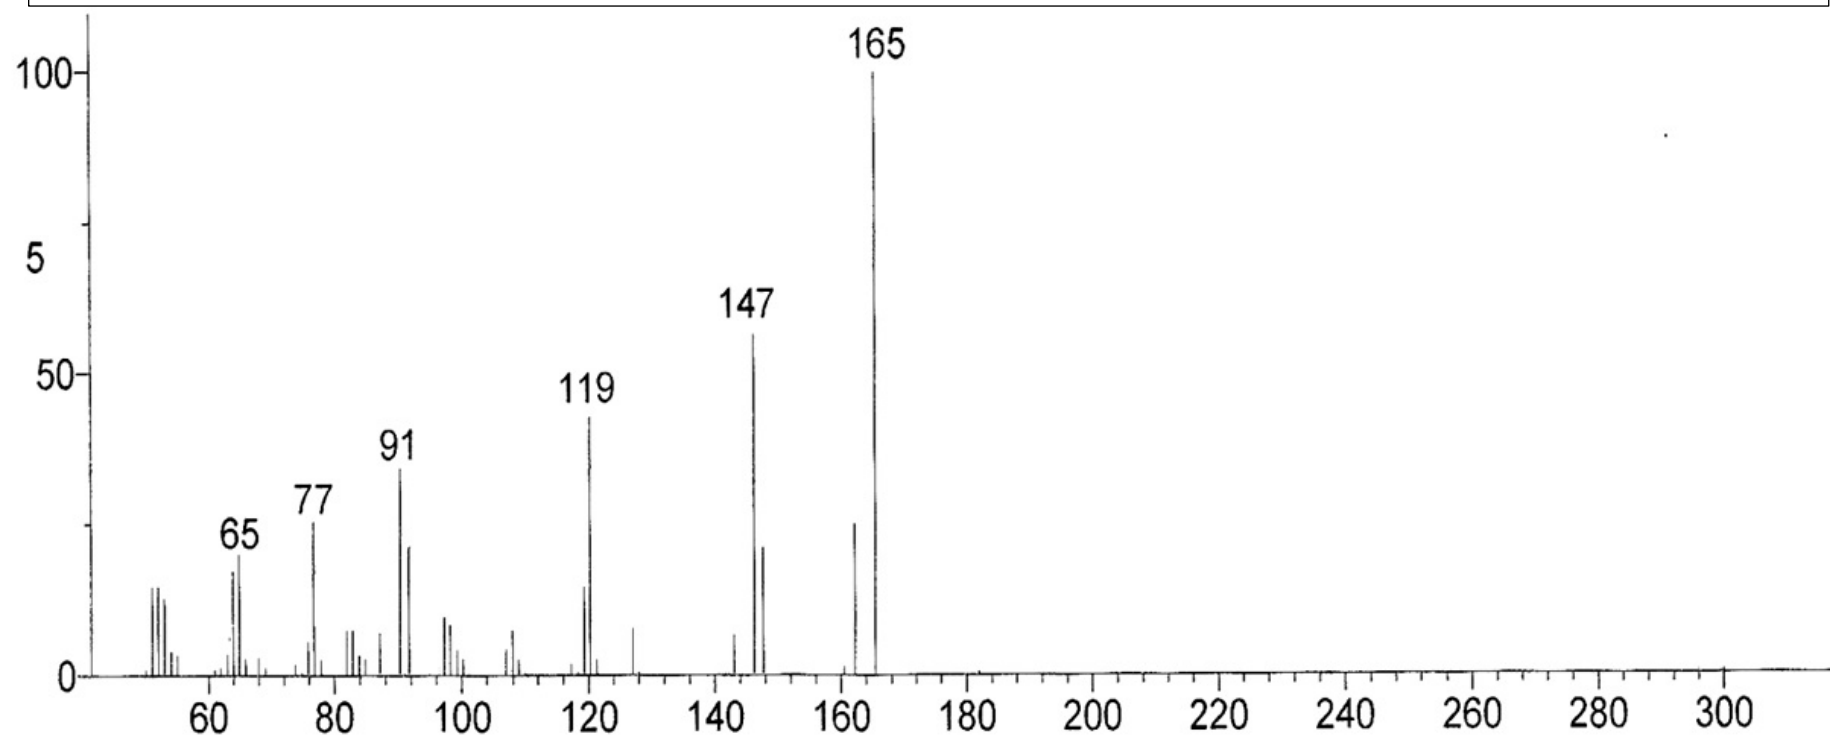



Figure S3c:EI-MS of FMC-3

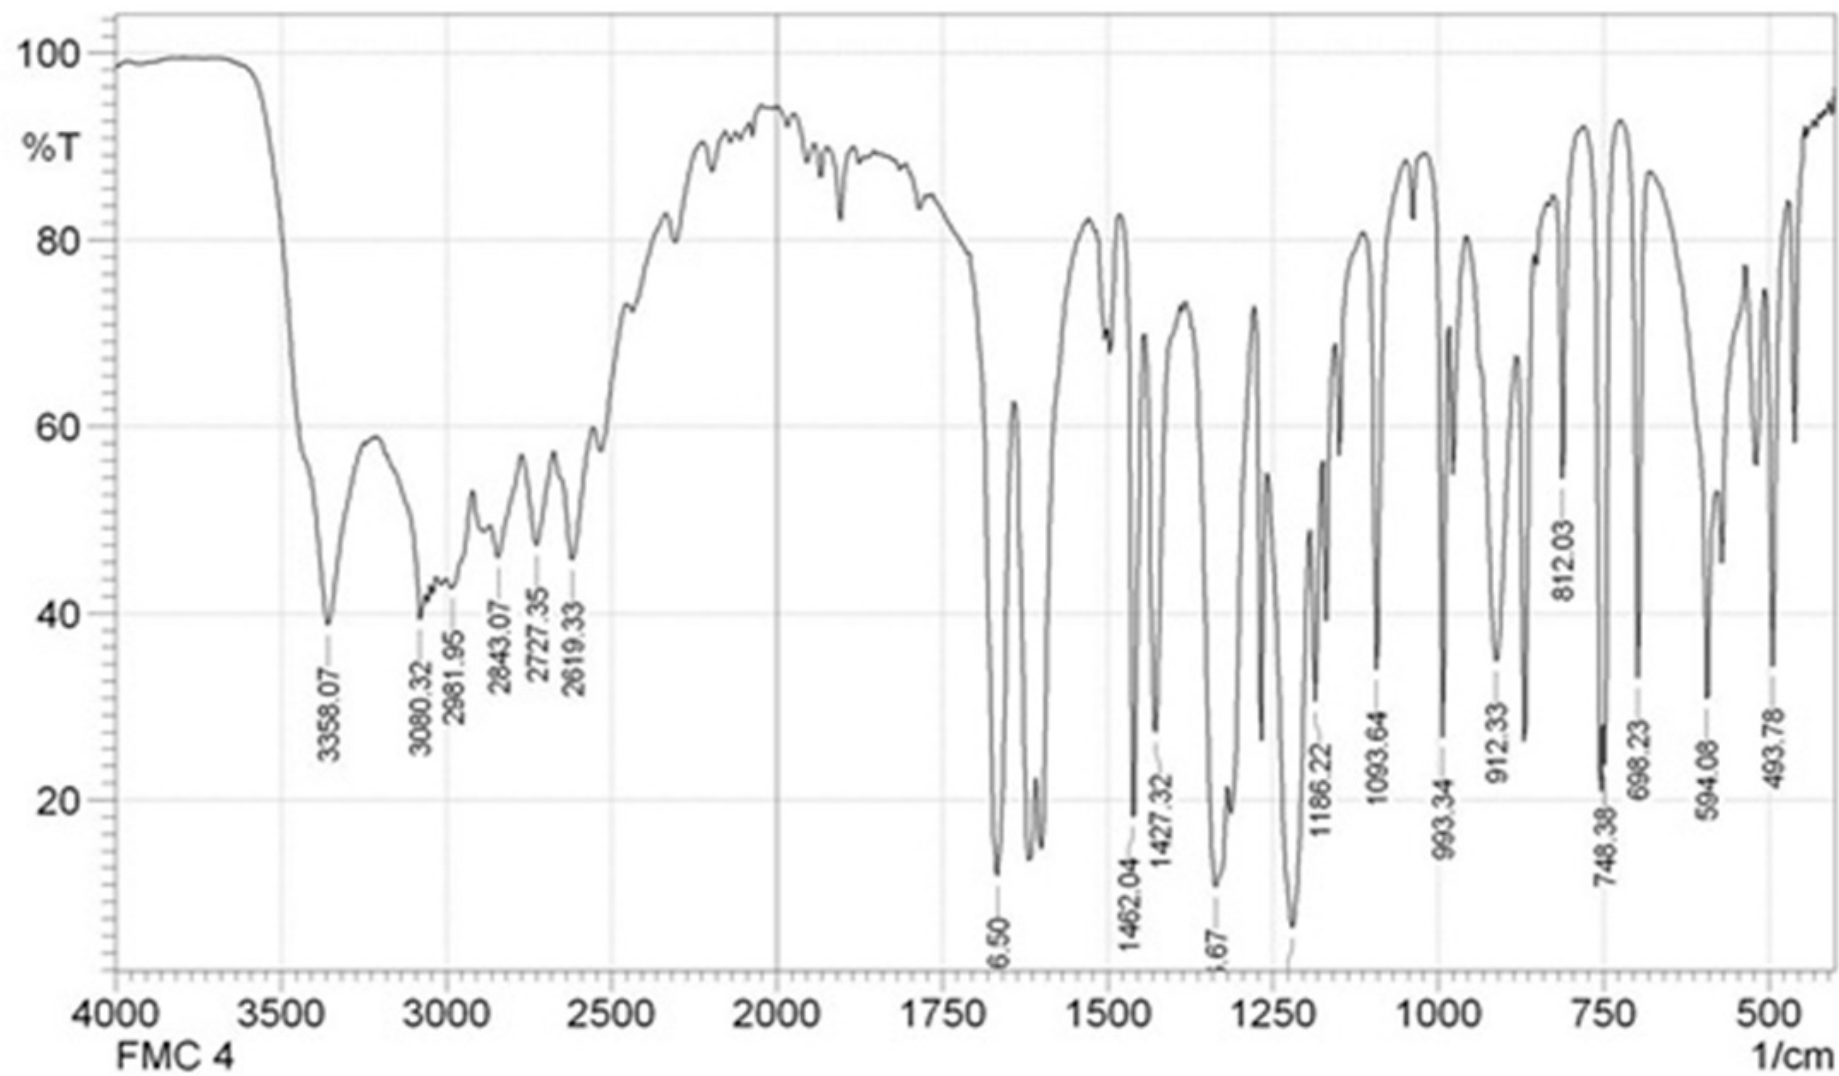

Supplement: s1 [file s1]
